# Supplementary material
Source: PubMed Central journal article supplement (PMC4291776)
Supplement: mp500405h_si_001.pdf [file mp500405h_si_001.pdf]

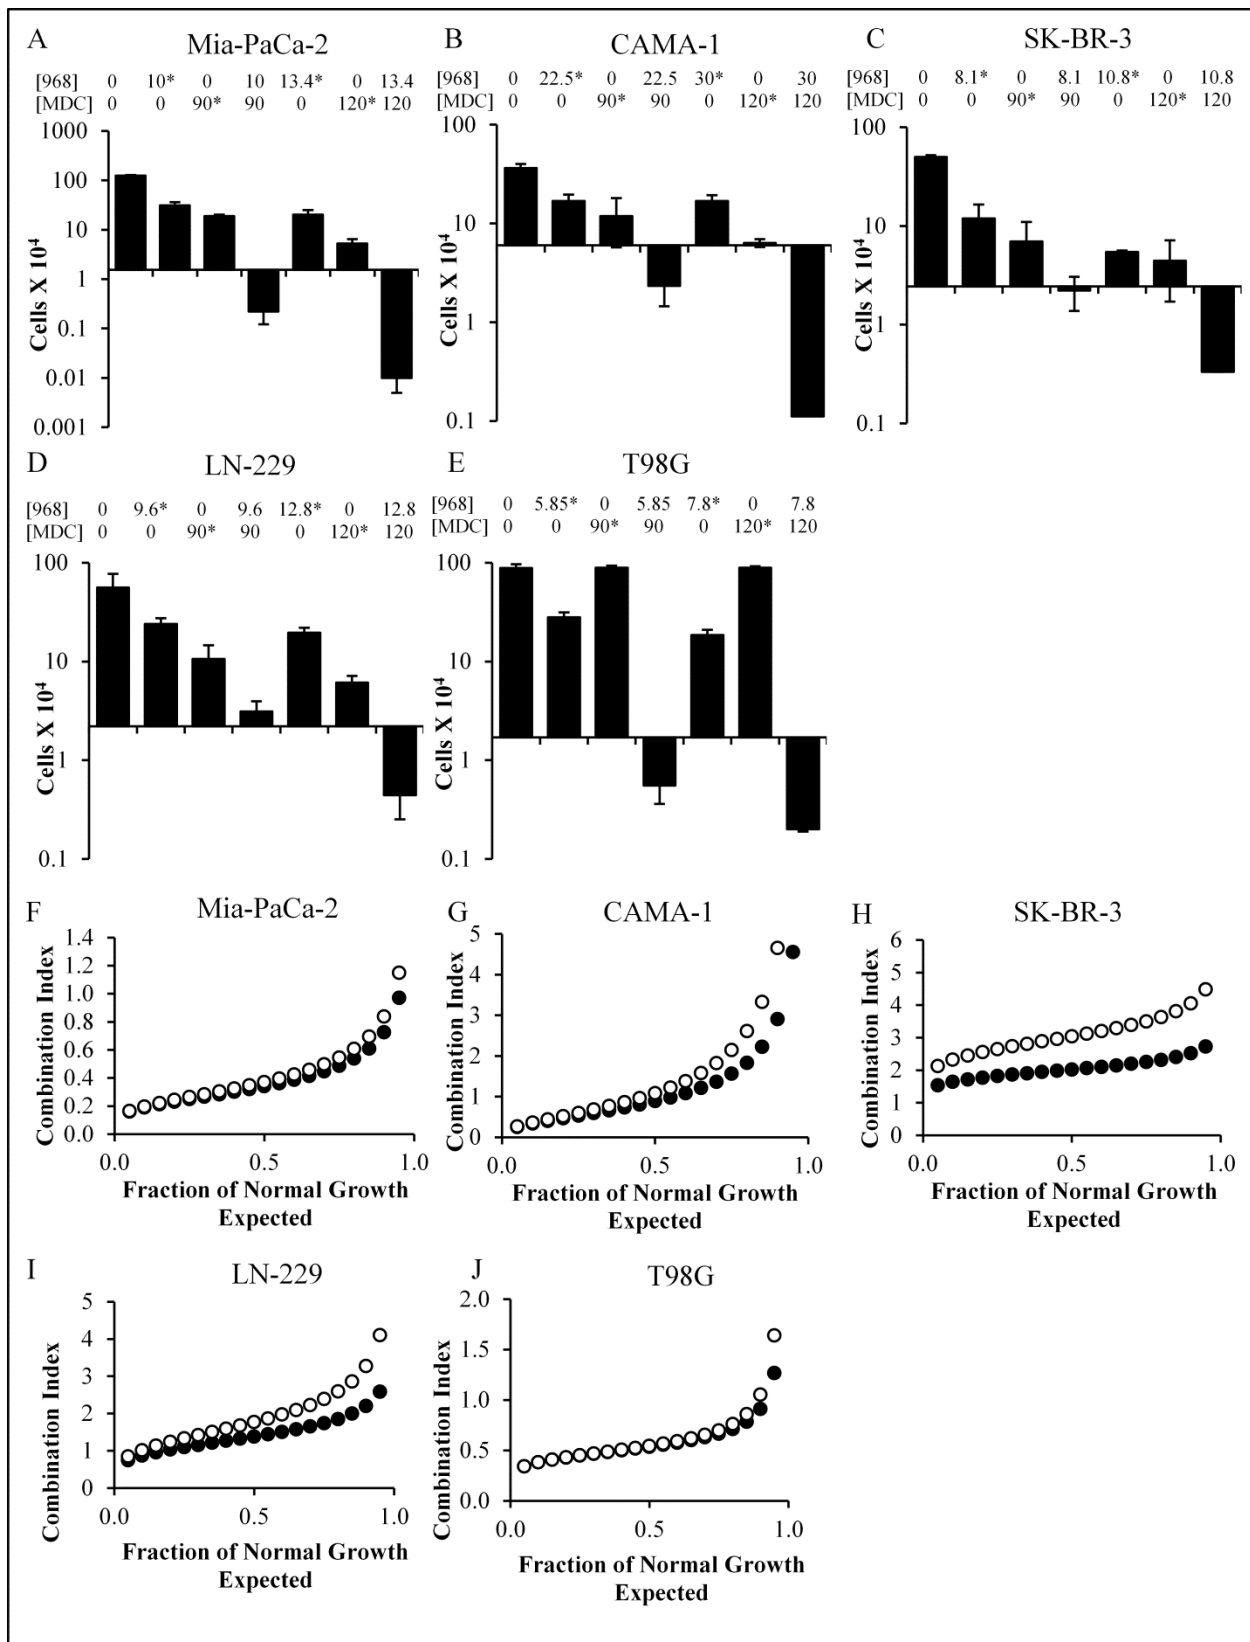

**Figure S11:** Combination treatment of numerous cancer cell lines using 968 and MDC. A-E) Histograms depicting specific data points collected from dose curves for 968, MDC, or 968 and MDC in the indicated cell lines. The Y-axes represent the number of cells in culture after 6 days of drug treatment, while the X-axes are positioned at the starting number of cells. Values indicated with \* were calculated from dose curves, and their error bars represent the standard deviation from the nearest experimental measurement. Drug concentrations are reported in  $\mu\text{M}$ . F-J) Combination Index (CI) calculated for 968 and MDC when used to treat the indicated cell lines, used at a ratio of  $\text{IC}_{50}(968) \mu\text{M}$  968 to  $60 \mu\text{M}$  MDC in any given case, where  $\text{IC}_{50}(968)$  was the  $\text{IC}_{50}$  for 968 for that particular cell line. The CI was calculated at regular intervals that represent a specific fraction (5%) of normal cell growth. Plots were determined considering the two drugs as either mutually exclusive (black circles) or mutually nonexclusive (white circles). Error bars in A-E represent the standard deviation of three separate experiments.

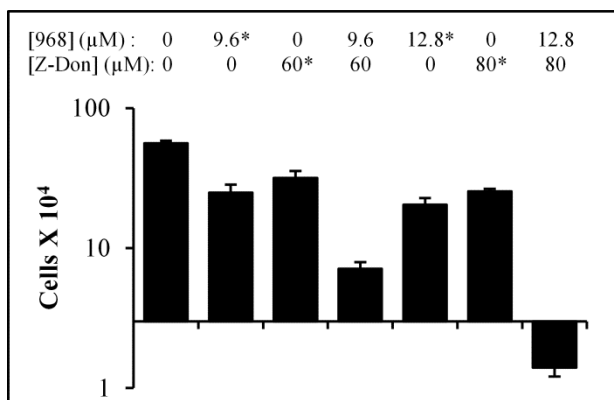

**Figure SI2:** LN-229 treated with 968 and Z-Don. Cells were cultured in the presence of 968, Z-Don, or a combination of 968 and Z-Don (at a ratio of 6.4  $\mu\text{M}$  968: 40  $\mu\text{M}$  Z-Don) for 6 days and then counted. The Y-axis represents the number of cells in culture after 6 days of drug treatment, while the X-axis is positioned at the starting number of cells. Values marked with \* were calculated from dose curves, and error bars represent the standard deviation from the nearest experimental measurement.

Supplemental Methods:

**Method of Chou and Talalay:**

The method of Chou and Talalay was used to determine drug synergism.<sup>38</sup> The results from the growth assays (performed as described in materials and methods) were used to determine the fraction of normal cell growth ( $Fg$ ) for each drug treatment (the drugs were used individually, or in combination, over a range of concentrations), with the ‘no drug’ treatment being considered the maximum  $Fg$  (i.e. 100% cell growth). The data were then plotted as linearized dose curves:  $\log[(1/Fg)-1]$  was plotted against the log of the drug dose. The resulting plots were fitted using Excel, and the slope and  $IC_{50}$  (determined from the X intercept) of each line was determined. These values allowed estimations of the concentration of each drug, or combination of drugs, required to obtain a certain fraction of the maximum growth of a cell line ( $Dose_{Fg}$ ) by the formula:

$$Dose_{Fg} = Dose_{IC_{50}} \left[ \frac{1 - Fg}{Fg} \right]^{\frac{1}{m}}$$

where  $Dose_{IC_{50}}$  is the  $IC_{50}$  of a drug or combination of drugs as calculated from the linearized dose curve, and  $m$  is the slope of that line.

$Dose_{Fg}$  was calculated for values of  $Fg$  between 0.95 and 0.05 in 0.05 increments. Because drugs in combinations were administered at a constant ratio  $Fraction(A):Fraction(B)$  (in this study, generally  $IC_{50}(A):IC_{50}(B)$ ), the relative concentration of each individual drug ( $Dose_A$  or  $Dose_B$ ) in any given value of  $Dose_{Fg}$  for the drug combination is determined by the equation:

$$Dose_A = Dose_{Fg} \left[ \frac{Fraction(A)}{Fraction(A) + Fraction(B)} \right]$$

Synergistic, additive, or antagonistic effects of various drug combinations on cells were then determined via calculation of the combination index (CI):

$$CI = \frac{Dose_A}{(Dose_{Fg})_A} + \frac{Dose_B}{(Dose_{Fg})_B} + \alpha * \frac{Dose_A Dose_B}{(Dose_{Fg})_A (Dose_{Fg})_B}$$

where  $(Dose_{Fg})_A$  is the concentration of drug A needed to obtain a given  $Fg$  value, and  $Dose_A$  is the concentration of that drug required to obtain the same value of  $Fg$  when drug A and drug B are used simultaneously.  $(Dose_{Fg})_B$  and  $Dose_B$  are analogous values for the second drug. The value  $\alpha$  is equal to 1 if the two drugs are mutually nonexclusive, and 0 if the drugs are mutually exclusive. CI values equal to 1 indicate drug combinations that produce additive effects, those greater than 1 indicate antagonistic effects, and those less than 1 indicate synergistic effects. The CI value was determined for each value of  $Fg$  and plotted for either value of  $\alpha$ .

### **Sample CI Calculation:**

MDA-MB-231 cells were cultured with varying concentrations of 968, Z-Don, or a combination of 968 and Z-Don, as indicated. Linearized dose curves (plotted as  $\log[(1/Fg)-1]$  vs.  $\log$  [total drug]) for the conditions are shown in Figure SI3. Data obviously outside the linear measurement range are not included on the plots.

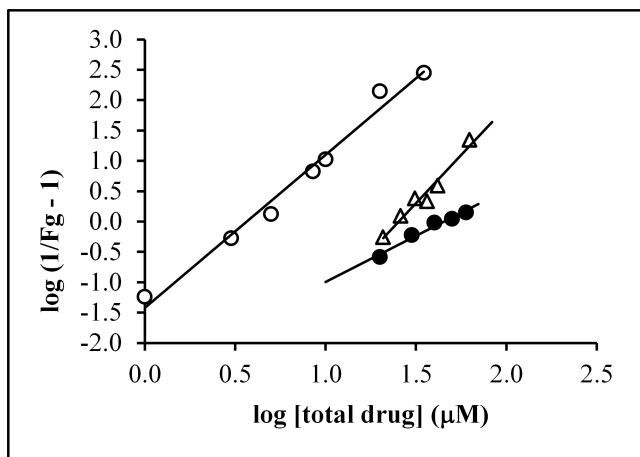

**Figure SI3:** Dose curves for 968 (white circles), Z-Don (black circles), and the combination of 968 and Z-Don (white triangles) when applied to MDA-MB-231 cells.

The  $IC_{50}$  for each drug or drug combination was calculated from the lines on the graph (Table SI1).

|                                                        | Z-Don  | 968    | Co-dose |
|--------------------------------------------------------|--------|--------|---------|
| y-intercept                                            | - 2.52 | - 1.42 | - 4.46  |
| slope                                                  | 1.52   | 2.52   | 3.18    |
| x-intercept = $-1 * y\text{-intercept} / \text{slope}$ | 1.65   | 0.56   | 1.40    |
| $IC_{50} = 10^{x\text{-intercept}}$                    | 45.07  | 3.66   | 25.37   |
| $IC_{50}$ determined in Sigmaplot                      | 37.5   | 4.2    | n.a.    |

**Table SI1:**  $IC_{50}$  values for assorted drug treatments.  $IC_{50}$  values (micromolar) were determined from best-fit linearized dose curves in Excel, and from sigmoidal dose curves in Sigmaplot.

Below is a step-by-step calculation of CI for the combination of Z-Don and 968 in MDA-MB-231 cells, at an arbitrarily selected  $F_g$  value of 0.9. Of note is that two  $IC_{50}$  values were

determined for each drug/cell dose curve. We report  $IC_{50}$  values derived from sigmoidal curves in Sigmaplot throughout the work, and we similarly use these values as the arbitrary ratio of drug A to drug B in combination dose curves. Thus, the ratio of Z-Don to 968 ( $Fraction(A):Fraction(B)$ ) in this example was 37.5:4.2 - these values allow the calculation of  $Dose_A$  and  $Dose_B$ . However, the calculation of  $Dose_{Fg}$ , requires the use of the slope of the linearized dose data. Therefore, the  $IC_{50}$  values derived from those lines are used to calculate  $Dose_{Fg}$ . Also note that Figure SI3 shows that the plots for 968 (white circles) and Z-Don (black circles) are not parallel. As such, it cannot be conclusively determined if 968 and Z-Don are mutually exclusive or mutually nonexclusive. Thus, CI calculations were conducted for both possibilities.

Step-by-step calculation (units removed for clarity):

$$(Dose_{Fg})_A \text{ (for Z-Don)} = IC_{50} * \left(\frac{1-Fg}{Fg}\right)^{\frac{1}{m}} = 45.07 * \left(\frac{1-0.9}{0.9}\right)^{\frac{1}{1.52}} = 10.64$$

$$(Dose_{Fg})_B \text{ (for 968)} = IC_{50} * \left(\frac{1-Fg}{Fg}\right)^{\frac{1}{m}} = 3.65 * \left(\frac{1-0.9}{0.9}\right)^{\frac{1}{2.52}} = 1.53$$

$$(Dose_{Fg})_C \text{ (for the co-dose)} = IC_{50} * \left(\frac{1-Fg}{Fg}\right)^{\frac{1}{m}} = 25.37 * \left(\frac{1-0.9}{0.9}\right)^{\frac{1}{3.18}} = 12.70$$

$$Dose_A \text{ (for Z-Don)} = (Dose_{Fg})_C \left[ \frac{Fraction(A)}{Fraction(A)+Fraction(B)} \right] = 12.70 * \frac{37.5}{37.5 + 4.2} = 11.42$$

$$Dose_B \text{ (for 968)} = (Dose_{Fg})_C \left[ \frac{Fraction(B)}{Fraction(A)+Fraction(B)} \right] = 12.70 * \frac{4.2}{37.5 + 4.2} = 1.28$$

and finally

$$CI = \frac{Dose_A}{(Dose_{Fg})_A} + \frac{Dose_B}{(Dose_{Fg})_B} + \alpha * \frac{Dose_A Dose_B}{(Dose_{Fg})_A (Dose_{Fg})_B}$$

$$= \frac{11.42}{10.64} + \frac{1.28}{1.53} + (1 \text{ or } 0) * \frac{11.42 * 1.28}{10.64 * 1.53}$$

giving CI = 1.91 for mutually exclusive drugs ( $\alpha = 0$ ) or CI = 2.81 for mutually nonexclusive drugs ( $\alpha = 1$ ).

Table SI2 shows these calculations for a full range of Fractional growth ( $Fg$ ) values, and Figure SI4 shows the resulting CI plot.

| Fg   | $(Dose_{Fg})_A$ | $(Dose_{Fg})_B$ | $(Dose_{Fg})_C$ | $Dose_A$ | $Dose_B$ | CI $\alpha=0$ | CI $\alpha=1$ |
|------|-----------------|-----------------|-----------------|----------|----------|---------------|---------------|
| 0.95 | 6.52            | 1.14            | 10.04           | 9.03     | 1.01     | 2.27          | 3.51          |
| 0.90 | 10.64           | 1.53            | 12.70           | 11.42    | 1.28     | 1.91          | 2.81          |
| 0.85 | 14.42           | 1.84            | 14.69           | 13.21    | 1.48     | 1.72          | 2.46          |
| 0.80 | 18.13           | 2.11            | 16.39           | 14.74    | 1.65     | 1.60          | 2.23          |
| 0.75 | 21.90           | 2.36            | 17.95           | 16.14    | 1.81     | 1.50          | 2.06          |
| 0.70 | 25.83           | 2.61            | 19.43           | 17.47    | 1.96     | 1.43          | 1.93          |
| 0.65 | 30.01           | 2.86            | 20.88           | 18.77    | 2.10     | 1.36          | 1.82          |
| 0.60 | 34.53           | 3.11            | 22.33           | 20.08    | 2.25     | 1.30          | 1.72          |
| 0.55 | 39.51           | 3.38            | 23.82           | 21.42    | 2.40     | 1.25          | 1.64          |
| 0.50 | 45.07           | 3.66            | 25.37           | 22.81    | 2.56     | 1.20          | 1.56          |
| 0.45 | 51.42           | 3.96            | 27.02           | 24.30    | 2.72     | 1.16          | 1.48          |
| 0.40 | 58.83           | 4.30            | 28.82           | 25.92    | 2.90     | 1.12          | 1.41          |
| 0.35 | 67.69           | 4.68            | 30.83           | 27.72    | 3.11     | 1.07          | 1.35          |
| 0.30 | 78.63           | 5.12            | 33.13           | 29.79    | 3.34     | 1.03          | 1.28          |
| 0.25 | 92.75           | 5.66            | 35.86           | 32.25    | 3.61     | 0.99          | 1.21          |
| 0.20 | 112.04          | 6.34            | 39.26           | 35.30    | 3.95     | 0.94          | 1.14          |
| 0.15 | 140.84          | 7.28            | 43.81           | 39.40    | 4.41     | 0.89          | 1.06          |
| 0.10 | 190.85          | 8.75            | 50.68           | 45.57    | 5.10     | 0.82          | 0.96          |
| 0.05 | 311.79          | 11.77           | 64.12           | 57.67    | 6.46     | 0.73          | 0.84          |

**Table SI2:** Calculations of CI values for different values of Fg for MDA-MB-231 cells treated with 968 and Z-Don.  $(Dose_{Fg})_A$  and  $Dose_A$  are calculated for Z-Don, while  $(Dose_{Fg})_B$  and  $Dose_B$  are calculated for 968, and  $(Dose_{Fg})_C$  is calculated for the combination dose.



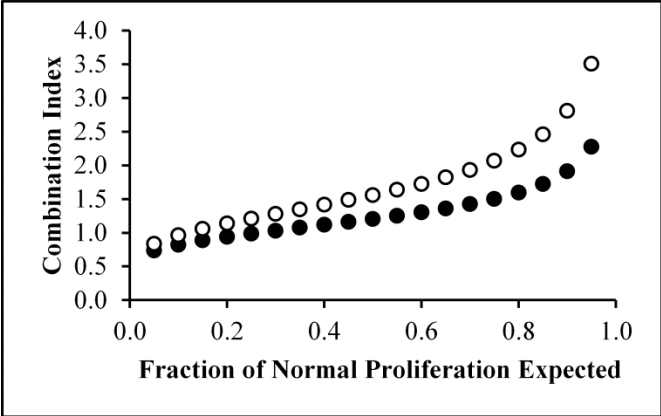

**Figure SI4:** Combination Index (CI) plot for MDA-MB-231 cells treated with 968 and Z-Don. CI values were determined assuming that the drugs were mutually exclusive (black circles) or mutually nonexclusive (white circles).
